# Supplementary material for: Oral Surgery and Osteoradionecrosis in Patients Undergoing Head and Neck Radiation Therapy: An Update of the Current Literature
Source: MDPI journal article supplement (doi:10.3390/biomedicines11123339), 2023-12-18
Supplement: s1 [file s1]

## Supplementary Information

**Table S1: Timing for dental extractions: pre-RT**

| PubMedID | First Author      | Year | Study design                        | Nr of included studies | Nr of included patients | % ORN | Range RT-ORN | Site of ORN                        | Associated risk factors | Time between extraction and RT | follow-up time | Conclusions/Recommendations                                                                                                                                      |
|----------|-------------------|------|-------------------------------------|------------------------|-------------------------|-------|--------------|------------------------------------|-------------------------|--------------------------------|----------------|------------------------------------------------------------------------------------------------------------------------------------------------------------------|
| 32531873 | Lajolo C          | 2021 | Systematic review                   | 8                      | 494                     | 2.2   | /            | Mandible                           | No                      | Only 13 studies: mean 24,7 d   | 30.6 m         | Teeth extractions before RT represent a risk factor for ORN, even it is generally recommended to remove oral foci before RT                                      |
| 35713725 | Costa Normando AG | 2022 | Systematic review and meta analysis | 28                     | 33662                   | 7     | 0-30 y       | Mandible (N=804)<br>Maxilla (N=64) | /                       | 14-34 m                        | 0–34 y         | 27/28 studies demonstrated a significant association between an increased risk of ORN and post-RT tooth extraction (odds ratio: 1.98; 95% CI: 1.17–3.35; p=0.01) |
| 35246621 | Ward R            | 2022 | Retrospective study                 | /                      | 154                     | 1.3   | /            | Mandible                           | /                       | 10-21 d                        | > 20 m         | No apparent correlation with healing time between extractions and RT                                                                                             |
| 35031745 | King R            | 2022 | Prospective study                   | /                      | 145                     | 0     | /            | /                                  | /                       | 13 d                           | < 24 m         | OPGs should be part of initial HNC staging and referral to Regional Oncology Centre dental services should be made as part of the pre-RT workup                  |

|          |              |      |                                     |    |             |      |          |                                  |                                               |   |           |                                                                                                                                                                                                                                                                                                |
|----------|--------------|------|-------------------------------------|----|-------------|------|----------|----------------------------------|-----------------------------------------------|---|-----------|------------------------------------------------------------------------------------------------------------------------------------------------------------------------------------------------------------------------------------------------------------------------------------------------|
| 33685773 | Beaumont S   | 2020 | Literature review                   | 21 | 14389/36294 | 5.50 | /        | /                                | /                                             | / | 6 m- 17 y | There was no statistically significant difference between extractions performed prior or after RT                                                                                                                                                                                              |
| 28862391 | See Toh YL   | 2017 | Retrospective study                 | /  | 207/231     | 2.60 | 1-24 m   | Mandible and maxilla             | Smoking and increased number of teeth removed | / | 52 m      | No correlation between dental extractions pre- or post-RT and the development of ORN                                                                                                                                                                                                           |
| 27473832 | Beech NM     | 2017 | Retrospective study                 | /  | 129/190     | 19   | /        | Mandible (N=26)<br>Maxilla (N=3) | Smoking status, p16 status negative           | / | /         | Pre-RT dental extractions appear to not protect against the development of ORN                                                                                                                                                                                                                 |
| 35029717 | Balermphas P | 2021 | Systematic review and meta-analysis | 7  | 432/875     | 21   | 1-67.7 m | Mandible and maxilla             | /                                             | / | /         | Tooth extraction before IMRT is more common than after IMRT, but dental extractions before compared to extractions after IMRT have not been proven to reduce the incidence of ORN. Pre-RT dental care and extractions remain the standard procedure to prevent dental complications from IMRT. |

HNC= Head and Neck cancer, IMRT= intensity modulated RT, m= months, OPG= orthopantomography, ORN=osteoradionecrosis, RT= Radiotherapy, y=years

**Table S2: Timing for dental extractions: after RT**

| PubMedID | First Author      | Year | Study design                        | Nr of included studies | Nr of included patients | % ORN | Range RT-ORN | Site of ORN                        | Associated risk factors                                                   | Time between extraction and RT | follow-up time | Conclusions/Recommandations                                                                                                                                      |
|----------|-------------------|------|-------------------------------------|------------------------|-------------------------|-------|--------------|------------------------------------|---------------------------------------------------------------------------|--------------------------------|----------------|------------------------------------------------------------------------------------------------------------------------------------------------------------------|
| 35713725 | Costa Normando AG | 2022 | Systematic review and meta analysis | 28                     | 11705                   | 11    | 0-30         | Mandible (N=804)<br>Maxilla (N=64) | /                                                                         | /                              | 0–34 m         | 27/28 studies demonstrated a significant association between an increased risk of ORN and post-RT tooth extraction (odds ratio: 1.98; 95% CI: 1.17–3.35; p=0.01) |
| 33685773 | Beaumont S        | 2020 | Literature review                   | 21                     | 6030/37805              | 5.30  | /            | /                                  | /                                                                         | > 6 mesi                       | 6 m- 17 y      | There was no statistically significant difference between extractions performed prior or after RT                                                                |
| 27401528 | Wanifuchi S       | 2016 | Retrospective study                 | /                      | 12206                   | 100   | /            | Mandible, molar region             | association between the irradiation field and the site of ORN development | 37.5 m                         | /              | All patients who received tooth extraction after RT developed ORN (100 %) independently of time between tooth extraction and the end of RT                       |
| 28862391 | See Toh YL        | 2017 | Retrospective study                 | /                      | 16/231                  | 0     | 1-24 m       | Mandible and maxilla               | Smoking and increased number of teeth removed                             | /                              | 52 m           | No correlation between dental extractions pre- or post-RT and the development of ORN                                                                             |

|          |         |      |                     |    |            |                      |        |                      |                                                                                                             |                                |                     |                                                                                                                                                                                                            |
|----------|---------|------|---------------------|----|------------|----------------------|--------|----------------------|-------------------------------------------------------------------------------------------------------------|--------------------------------|---------------------|------------------------------------------------------------------------------------------------------------------------------------------------------------------------------------------------------------|
| 27086489 | Kuo T   | 2016 | Retrospective study | /  | 522/1759   | 2.22                 | 3.02 y | Mandible             | number of teeth removed, > timing of extraction after RT                                                    | stratified if > or < 6 m       | 3.65 y              | A tooth extraction time less than half a year after RT or during the head and neck RT period, and extraction tooth number $\leq 5$ would significantly lower the ORN prevalence.                           |
| 21115324 | Nabil S | 2011 | Systematic Review   | 19 | 828        | 7                    | /      | Mandible and maxilla | protective factors: prophylactic HBO and antibiotics - risk factor: RT dose > 60Gy                          | /                              | 1-42 m              | Incidence of ORN after post-RT tooth extractions is low, the extraction of mandibular teeth within the radiation field in patients who received a RT > 60 Gy represents the highest risk of developing ORN |
| 34261515 | Khoo SC | 2021 | Retrospective study | /  | 73         | 21.9                 | /      | Mandible and maxilla | Extraction > 5 y after RT, surgical removal procedure and invisible upper cortical line of mandibular canal | mean year of 9.02 $\pm$ 6.57 y | /                   | Extraction more than 5 years after radiotherapy, surgical removal procedure and invisible upper cortical line of mandibular canal on the DPT were the predictors of ORN                                    |
| 28370713 | Wang T  | 2017 | Retrospective study | /  | 4513/23527 | 3.93 per 100 person- | 222 d  | Mandible and maxilla | Protective effect: steroids                                                                                 | 3 y                            | 43.778 person-years | Post-RT extraction was associated with gradually increased risk of ORNJ over time that peaked at 4 to 5 years                                                                                              |

|          |        |      |                      |   |    |           |   |                             |   |       |   |                                                                                                                                            |
|----------|--------|------|----------------------|---|----|-----------|---|-----------------------------|---|-------|---|--------------------------------------------------------------------------------------------------------------------------------------------|
|          |        |      |                      |   |    | year<br>s |   |                             |   |       |   |                                                                                                                                            |
| 17222536 | Lye KW | 2007 | Prospective<br>study | / | 40 | 1.90      | / | Mandibl<br>e and<br>maxilla | / | 5.6 y | / | Post-RT extractions have a<br>low risk of complications and<br>the results point to age as a<br>factor that may influence<br>wound healing |

DPT =dental panoramic tomogram, m= months, ORN=osteoradionecrosis, RT= Radiotherapy, y=years
